# Supplementary material for: Classical biological control of the African citrus psyllid Trioza erytreae, a major threat to the European citrus industry
Source: PubMed Central journal article supplement (PMC6603031; doi:10.1038/s41598-019-45294-w), 2019-07-01

1 **Supplementary Information**

2 **Title:** Classical biological control of the African citrus psylla *Trioza erytraea*, a major threat to  
3 the European citrus industry

4 **Author list:** J. Pérez-Rodríguez, K. Krüger, M. Pérez-Hedo, O. Ruíz-Rivera, A. Urbaneja, A.  
5 Tena.

6

7

8

9

10

11

12

13

14

15

16

17

18

19

20

21

22 **Supplementary Table S1.** Sampling dates and sites, number and variety of sampled trees per  
23 site and symptoms and presence of *T. erythrae*. Asterisks are used when *T. erythrae* was  
24 parasitized.

| Sampling date | Locality     | Province     | Coordinates               | Type of orchard    | Rutacea Host             | No. trees sampled | <i>Trioza</i> sympons | Presence of <i>Trioza</i> |
|---------------|--------------|--------------|---------------------------|--------------------|--------------------------|-------------------|-----------------------|---------------------------|
| 21/09/2017    | Citrusdal    | Western Cape | 32°36'27.3"S 18°56'37.8"E | Commercial         | <i>Citrus sinensis</i>   | 50                | No                    | No                        |
| 21/09/2017    | Citrusdal    | Western Cape | 32°36'31.6"S 18°56'39.9"E | Commercial         | <i>Citrus reticulata</i> | 50                | No                    | No                        |
| 21/09/2017    | Citrusdal    | Western Cape | 32°36'23.3"S 18°56'51.7"E | Commercial         | <i>Citrus sinensis</i>   | 50                | No                    | No                        |
| 21/09/2017    | Citrusdal    | Western Cape | 32°36'37.2"S 18°56'32.1"E | Commercial         | <i>Citrus limon</i>      | 50                | No                    | No                        |
| 21/09/2017    | Citrusdal    | Western Cape | 32°35'43.2"S 19°00'50.2"E | Private garden     | <i>Citrus sinensis</i>   | 2                 | No                    | No                        |
| 21/09/2017    | Citrusdal    | Western Cape | 32°51'18.0"S 19°05'55.8"E | Commercial         | <i>Citrus sinensis</i>   | 50                | No                    | No                        |
| 21/09/2017    | Citrusdal    | Western Cape | 32°51'19.0"S 19°05'40.4"E | Commercial         | <i>Citrus sinensis</i>   | 50                | No                    | No                        |
| 21/09/2017    | Citrusdal    | Western Cape | 32°36'37.3"S 19°00'01.2"E | Organic commercial | <i>Citrus limon</i>      | 50                | No                    | No                        |
| 21/09/2017    | Citrusdal    | Western Cape | 32°36'27.2"S 18°59'55.5"E | Organic commercial | <i>Citrus limon</i>      | 50                | No                    | No                        |
| 21/09/2017    | Citrusdal    | Western Cape | 32°36'42.4"S 19°00'05.5"E | Organic commercial | <i>Citrus reticulata</i> | 50                | No                    | No                        |
| 22/09/2017    | Citrusdal    | Western Cape | 32°37'03.5"S 18°57'20.6"E | Organic commercial | <i>Citrus reticulata</i> | 10                | No                    | No                        |
| 22/09/2017    | Citrusdal    | Western Cape | 32°37'03.5"S 18°57'20.6"E | Private garden     | <i>Citrus sinensis</i>   | 4                 | No                    | No                        |
| 22/09/2017    | Citrusdal    | Western Cape | 32°37'03.5"S 18°57'20.6"E | Private garden     | <i>Citrus limon</i>      | 2                 | No                    | No                        |
| 22/09/2017    | Citrusdal    | Western Cape | 32°21'23.4"S 18°55'52.5"E | Organic commercial | <i>Citrus sinensis</i>   | 50                | No                    | No                        |
| 22/09/2017    | Citrusdal    | Western Cape | 32°21'28.7"S 18°55'56.2"E | Organic commercial | <i>Citrus sinensis</i>   | 50                | No                    | No                        |
| 22/09/2017    | Stellenbosch | Western Cape | 33°49'21.8"S 18°55'48.1"E | Private garden     | <i>Citrus sinensis</i>   | 100               | No                    | No                        |
| 22/09/2017    | Stellenbosch | Western Cape | 33°56'11.0"S 18°51'56.3"E | Private garden     | <i>Citrus sinensis</i>   | 5                 | No                    | No                        |
| 26/09/2017    | Nelspruit    | Mpumalanga   | 25°27'09.0"S 30°58'06.4"E | Organic commercial | <i>Citrus sinensis</i>   | 50                | No                    | No                        |
| 26/09/2017    | Nelspruit    | Mpumalanga   | 25°27'07.9"S 30°58'16.1"E | Organic commercial | <i>Citrus limon</i>      | 50                | No                    | No                        |
| 27/09/2017    | Nelspruit    | Mpumalanga   | 25°23'04.3"S 30°32'33.8"E | Nursery            | <i>Citrus sinensis</i>   | 20                | Yes                   | No                        |
| 27/09/2017    | Nelspruit    | Mpumalanga   | 25°23'06.7"S 30°32'34.1"E | Commercial         | <i>Citrus sinensis</i>   | 20                | No                    | No                        |
| 27/09/2017    | Nelspruit    | Mpumalanga   | 25°22'44.2"S 30°31'50.7"E | Organic commercial | <i>Citrus limon</i>      | 50                | No                    | No                        |
| 27/09/2017    | Nelspruit    | Mpumalanga   | 25°22'44.2"S 30°31'50.7"E | Abandoned orchard  | <i>Citrus reticulata</i> | 10                | No                    | No                        |
| 27/09/2017    | Nelspruit    | Mpumalanga   | 25°22'35.5"S 30°32'30.8"E | Private garden     | <i>Citrus limon</i>      | 1                 | No                    | No                        |
| 27/09/2017    | Nelspruit    | Mpumalanga   | 25°22'49.1"S 30°34'03.0"E | Private garden     | <i>Citrus limon</i>      | 1                 | No                    | No                        |
| 27/09/2017    | Nelspruit    | Mpumalanga   | 25°22'35.7"S 30°32'33.0"E | Commercial         | <i>Citrus limon</i>      | 1                 | No                    | No                        |
| 27/09/2017    | Nelspruit    | Mpumalanga   | 25°26'42.8"S 30°57'57.4"E | Public garden      | <i>Citrus aurantium</i>  | 0                 | No                    | No                        |
| 28/09/2017    | Nelspruit    | Mpumalanga   | 25°27'31.5"S 31°02'46.5"E | Commercial         | <i>Citrus sinensis</i>   | 0                 | Yes                   | No                        |
| 28/09/2017    | Nelspruit    | Mpumalanga   | 25°27'12.2"S 31°01'58.2"E | Abandoned orchard  | <i>Citrus sinensis</i>   | 20                | No                    | No                        |
| 28/09/2017    | Nelspruit    | Mpumalanga   | 25°27'30.2"S 31°02'35.0"E | Abandoned orchard  | <i>Citrus limon</i>      | 20                | No                    | No                        |
| 28/09/2017    | Nelspruit    | Mpumalanga   | 25°27'58.2"S 31°02'32.4"E | Commercial         | <i>Citrus limon</i>      | 50                | No                    | No                        |
| 28/09/2017    | Nelspruit    | Mpumalanga   | 25°28'48.4"S 30°59'38.2"E | Experimental farm  | <i>Citrus limon</i>      | 30                | Yes                   | Yes*                      |

|            |              |            |                           |                    |                                |     |     |      |
|------------|--------------|------------|---------------------------|--------------------|--------------------------------|-----|-----|------|
| 29/09/2017 | Nelspruit    | Mpumalanga | 25°27'07.7"S 30°58'09.5"E | Nursery            | <i>Citrus sinensis</i>         | 50  | No  | No   |
| 29/09/2017 | Nelspruit    | Mpumalanga | 25°27'07.4"S 30°58'15.9"E | Assay              | <i>Citrus limon</i>            | 50  | Yes | Yes* |
| 29/09/2017 | Nelspruit    | Mpumalanga | 25°28'21.9"S 30°59'29.8"E | Public garden      | <i>Citrus aurantium</i>        | 10  | Yes | No   |
| 29/09/2017 | Nelspruit    | Mpumalanga | 25°28'45.8"S 30°59'38.0"E | colony             | <i>Citrus sinensis</i>         | 20  | No  | No   |
| 03/10/2017 | Letsitele    | Limpopo    | 23°52'01.0"S 30°23'20.0"E | Privat garden      | <i>Murraya exotica</i>         | 1   | No  | No   |
| 03/10/2017 | Letsitele    | Limpopo    | 23°52'07.0"S 30°23'29.6"E | Privat garden      | <i>Murraya exotica</i>         | 3   | No  | No   |
| 03/10/2017 | Letsitele    | Limpopo    | 23°51'44.7"S 30°23'01.9"E | Commercial         | <i>Citrus sinensis</i>         | 50  | No  | No   |
| 03/10/2017 | Tzaneen      | Limpopo    | 23°55'11.8"S 30°13'58.4"E | Private garden     | <i>Citrus limon</i>            | 3   | No  | No   |
| 03/10/2017 | Tzaneen      | Limpopo    | 23°50'24.0"S 30°18'07.2"E | Commercial         | <i>Citrus sinensis</i>         | 150 | No  | No   |
| 04/10/2017 | Tzaneen      | Limpopo    | 23°55'11.8"S 30°13'58.4"E | Organic commercial | <i>Citrus sinensis</i>         | 150 | Yes | No   |
| 04/10/2017 | Tzaneen      | Limpopo    | 23°54'42.1"S 30°13'28.0"E | Organic commercial | <i>Citrus sinensis</i>         | 150 | Yes | No   |
| 04/10/2017 | Tzaneen      | Limpopo    | 23°53'14.7"S 30°19'44.8"E | Organic commercial | <i>Citrus sinensis</i>         | 150 | Yes | No   |
| 04/10/2017 | Tzaneen      | Limpopo    | 23°55'06.3"S 30°13'59.5"E | Organic commercial | <i>Citrus sinensis</i>         | 150 | Yes | No   |
| 04/10/2017 | Tzaneen      | Limpopo    | 23°55'07.9"S 30°13'55.4"E | Organic commercial | <i>Citrus sinensis</i>         | 150 | Yes | No   |
| 04/10/2017 | Nkowankowa-C | Limpopo    | 23°53'24.4"S 30°19'40.7"E | Private garden     | <i>Citrus limon</i>            | 2   | No  | No   |
| 04/10/2017 | Nkowankowa-C | Limpopo    | 23°53'27.9"S 30°19'39.6"E | Private garden     | <i>Citrus limon</i>            | 3   | Yes | No   |
| 04/10/2017 | Nkowankowa-C | Limpopo    | 23°53'25.6"S 30°19'42.1"E | Private garden     | <i>Citrus limon</i>            | 1   | No  | No   |
| 04/10/2017 | Nkowankowa-C | Limpopo    | 23°53'19.3"S 30°19'43.8"E | Private garden     | <i>Citrus limon</i>            | 2   | No  | No   |
| 04/10/2017 | Nkowankowa-C | Limpopo    | 23°53'31.0"S 30°19'45.3"E | Private garden     | <i>Citrus limon</i>            | 1   | Yes | No   |
| 05/10/2017 | Tzaneen      | Limpopo    | 23°50'13.7"S 30°09'37.8"E | Private garden     | <i>Citrus limon/reticulata</i> | 5   | Yes | Yes* |
| 05/10/2017 | Tzaneen      | Limpopo    | 23°47'56.8"S 30°26'11.0"E | Private garden     | <i>Citrus limon</i>            | 5   | No  | No   |
| 05/10/2017 | Tzaneen      | Limpopo    | 23°47'54.1"S 30°26'07.9"E | Private garden     | <i>Citrus limon</i>            | 50  | No  | No   |
| 05/10/2017 | Pretoria     | Gauteng    | 25°44'52.8"S 28°15'32.1"E | Experimental farm  | <i>Citrus limon</i>            | 10  | No  | No   |
| 05/10/2017 | Pretoria     | Gauteng    | 25°44'52.1"S 28°15'33.6"E | Experimental farm  | <i>Citrus limon</i>            | 25  | Yes | Yes* |
| 09/10/2017 | Pretoria     | Gauteng    | 25°45'40.6"S 28°14'12.5"E | Private garden     | <i>Citrus sinensis</i>         | 4   | No  | No   |
| 09/10/2017 | Pretoria     | Gauteng    |                           | Private garden     | <i>Citrus limon</i>            | 3   | Yes | Yes  |
| 09/10/2017 | Pretoria     | Gauteng    |                           | Private garden     | <i>Murraya exotica</i>         |     |     |      |
| 09/10/2017 | Pretoria     | Gauteng    | 25°44'21.4"S 28°16'24.7"E | Public garden      | <i>Citrus aurantium</i>        | 10  | No  | No   |

|            |          |         |                           |                |                        |   |     |      |
|------------|----------|---------|---------------------------|----------------|------------------------|---|-----|------|
| 10/10/2017 | Pretoria | Gauteng |                           | Private garden | <i>Citrus limon</i>    | 5 | Yes | No   |
| 20/10/2017 | Pretoria | Gauteng | 25°45'30.5"S 28°14'31.4"E | Public garden  | <i>Citrus sinensis</i> | 3 | No  | No   |
| 01/11/2017 | Pretoria | Gauteng |                           | Private garden | <i>Citrus limon</i>    | 1 | Yes | No   |
| 17/11/2017 | Pretoria | Gauteng | 25°49'55.6"S 27°53'20.3"E | Public garden  | <i>Citrus sinensis</i> | 5 | No  | No   |
| 09/12/2017 | Pretoria | Gauteng |                           | Private garden | <i>Citrus limon</i>    | 6 | Yes | Yes* |

**Supplementary Figure S1.** Nucleotide sequence of COI barcode fragment for *Trioza erythrae* generated in the present work. Deduced amino acid (aa) sequence of the corresponding polypeptide is shown under each triplet. The coding region (cds) of *T. erythrae* COI gene and specific primers position used for the amplification of the barcode fragment –714 bp including the sequence primers– are shown for schematic purposes. Coordinates of COI cds are given with respect to the mitochondrial nucleotide sequence of *T. erythrae* (GeneBank accession number: NC\_038142).

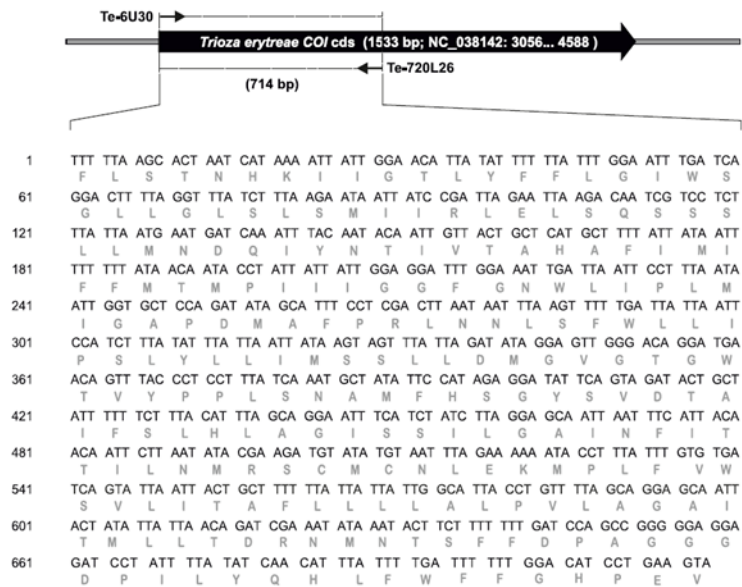

Supplement: 41598_2019_45294_MOESM1_ESM.pdf [file 41598_2019_45294_MOESM1_ESM.pdf]
